# Supplementary material for: The ecdysis triggering hormone system is essential for successful moulting of a major hemimetabolous pest insect, Schistocerca gregaria
Source: PubMed Central journal article supplement (PMC5394484; doi:10.1038/srep46502), 2017-04-18
Supplement: srep46502-s1.pdf [file srep46502-s1.pdf]

# The ecdysis triggering hormone system is essential for successful moulting of a major hemimetabolous pest insect, *Schistocerca gregaria*.

Cynthia Lenaerts<sup>1</sup>, Dorien Cools<sup>1</sup>, Rik Verdonck<sup>1</sup>, Lina Verbakel<sup>1</sup>, Jozef Vanden Broeck<sup>1</sup>, Elisabeth Marchal<sup>1\*</sup>

## Supplementary figures

```

TricaETHR-A 1 MISSKFSPSTTTTTTTTTSSALNSTPLIEFNISTSNYLYTPSSSTID-----
TricaETHR-B 1 MISSKFSPSTTTTTTTTTSSALNSTPLIEFNISTSNYLYTPSSSTID-----
AedaeETHR-A 1 -----
AedaeETHR-B 1 -----
BommoETHR-A 1 MISTINYTQS-----QTNVNILHVA---YSSYGNDIENVTEY-----R
BommoETHR-B 1 MISTINYTQS-----QTNVNILHVA---YSSYGNDIENVTE-----YR
ManseETHR-A 1 MISTVDFTHT-----QTNVNTTLLNYDANIKNYNFTYKNA TENDTFGKNGLYDSDFEFG
ManseETHR-B 1 MISTVDFTHT-----QTNVNTTLLNYDANIKNYNFTYKNA TENDAFGKNGLYDSDFEFG
DromeETHR-A 1 -----
DromeETHR-B 1 -----
SchgrETHR 1 -----MNLAL-----SAALHNA SEGAAVGSPFLPASFFN--
  
```

```

TricaETHR-A 46 -----LYNT-----SSVSNFNESSSSVFPNYIRTTSMVFCCIIMCLGVIGN
TricaETHR-B 46 -----LYNT-----SSVSNFNESSSSVFPNYIRTTSMVFCCIIMCLGVIGN
AedaeETHR-A 1 -----MPQIPEYIRATSMVFCCIIMCLGVIGN
AedaeETHR-B 1 -----MPQIPEYIRATSMVFCCIIMCLGVIGN
BommoETHR-A 36 T-KSEAAVDLDDAFRNGSLTNTTIGYTNNNFTEYAEI PHYIKITSMTFCIAIMCLGVIGN
BommoETHR-B 36 T-KSEAAVDLDDAFRNGSLTNTTIGYTNNNFTEYAEI PHYIKITSMTFCIAIMCLGVIGN
ManseETHR-A 54 NSSFQNSNLINSTFENSNLTD SAFEMPNDNFTEYAEV PYYIKATSMTF CIVIMCLGVIGN
ManseETHR-B 54 NSSFQNSNLINSTFENSNLTD SAFEMPNDNFTEYAEV PYYIKATSMTF CIVIMCLGVIGN
DromeETHR-A 1 -----MLPQIPSYIRTTAMFFCIVIMLLGVVGN
DromeETHR-B 1 -----MLPQIPSYIRTTAMFFCIVIMLLGVVGN
SchgrETHR 30 A-----TSWSAGAGA-NGSVASAPDVGDPQVPAYIRTASTVACVIMSIGVAGN
  
```

```

TricaETHR-A 87 VMVPIVILKTKDMRNSTNIFLVNLSVADLMVLLVCTPTVLVEVNSRPETWVLGREMCKAV
TricaETHR-B 87 VMVPIVILKTKDMRNSTNIFLVNLSVADLMVLLVCTPTVLVEVNSRPETWVLGREMCKAV
AedaeETHR-A 28 VMVPIVILKTKDMRNSTNIFL TNLSIADLLVLLVCTPTVLVEVNSPPEVWVLGEMCKAV
AedaeETHR-B 28 VMVPIVILKTKDMRNSTNIFL TNLSIADLLVLLVCTPTVLVEVNSPPEVWVLGEMCKAV
BommoETHR-A 95 VMVPIVILKTKDMRNSTNIFLVNLSIADLMVLLVCTPTVLVEVNSKPETWVLGKELCLAV
BommoETHR-B 95 VMVPIVILKTKDMRNSTNIFLVNLSIADLMVLLVCTPTVLVEVNSKPETWVLGKELCLAV
ManseETHR-A 114 VMVPIVILKTKDMRNSTNIFLVNLSIADLMVLLVCTPTVLVEVNSKPETWVLGKELCLAV
ManseETHR-B 114 VMVPIVILKTKDMRNSTNIFLVNLSIADLMVLLVCTPTVLVEVNSKPETWVLGKELCLAV
DromeETHR-A 29 VMVPIVILKTKDMRNSTNIFL TNLSIADLLVLLVCTPTVLVEVNTRPETWVLGHEMCKAV
DromeETHR-B 29 VMVPIVILKTKDMRNSTNIFL TNLSIADLLVLLVCTPTVLVEVNTRPETWVLGHEMCKAV
SchgrETHR 79 AMVPAVILRSRDMRNSTNIFLVNLSVADLLVLLVCTPTVLVEVHSRPEVWVLLGETMCKAV
  
```

```

TricaETHR-A 147 PFVELTVAHASVLTILAISFERYYAICKPLKAGYICTKTRASLICLLAWFIAALFTSPML
TricaETHR-B 147 PFVELTVAHASVLTILAISFERYYAICKPLKAGYICTKTRASLICLLAWFIAALFTSPIL
AedaeETHR-A 88 PFVELTVAHASVLTILAISFERYYAICEPLKAGYVCTKARALMICLAAWTVAAILTSPIL
AedaeETHR-B 88 PFVELTVAHASVLTILAISFERYYAICEPLKAGYVCTKARALMICLAAWTVAAILTSPIL
BommoETHR-A 155 PFVELTVTHASVLTILAISFERYYAICEPLRAGYVCTKTRATLICALVWFFAALFTSPIL
BommoETHR-B 155 PFVELTVTHASVLTILAISFERYYAICEPLRAGYVCTKTRATLICALVWFFAALFTSPIL
ManseETHR-A 174 PFVELTVTHASVLTILAISFERYYAICEPLRAGYVCTKTRATLICALVWFFAALFTSPIL
ManseETHR-B 174 PFVELTVTHASVLTILAISFERYYAICEPLRAGYVCTKTRATLICALVWFFAALFTSPIL
DromeETHR-A 89 PFVELTVAHASVLTILAISFERYYAICEPLKAGYVCTKGRAILICVLAWGIAALFTSPIL
DromeETHR-B 89 PFVELTVAHASVLTILAISFERYYAICEPLKAGYVCTKGRAILICVLAWGIAALFTSPIL
SchgrETHR 139 PFVELTVAHASVLTILAISFERYYAICEPLRAGYVCTKARALLICLLAWALAALFTSPVI
  
```

+ TM5

*Trica*ETHR-A 207 VIAEYKQLDYFDGSKVPACHTLANTFWSALYFLTIIFLFFIIPLIILLILYCIITAKNLM

*Trica*ETHR-B 207 AITQYGPPEEYVDGSIIVFCFSLVEDTLPCVFFLGSILIFFIFPLAILIIVYILIAKTLMH

*Aedae*ETHR-A 148 LFAEYSVEEYPDGSRAAVCLTKASNVWIVTFFLMTISLFFLLPLVILVLYAIITAKNLIA

*Aedae*ETHR-B 148 MISSYEYVEYVNGKMWASCLTPVENFWHATFFVASIVVFFIVPLLILVLYSVIAKNLMD

*Bommo*ETHR-A 215 AIADHKA-TSVNGIVVNOCLTQAGTVEITFFVTIILLLYLLPLIILIVLYSVIAKNLIT

*Bommo*ETHR-B 215 AVATFTYEQDEDGTEVPVCLTQADTFWSALFFILTIAIAFFIVPLGVLLVLYSVIAKNLME

*Manse*ETHR-A 234 AIAEHHTIVHHDGTTTSQCLTQAVTFWQISFFVMIILLLYILPLIILIVLYSVIAKNLIT

*Manse*ETHR-B 234 GVAKEITYEKYSODGTEVPVCLTQADTFWSALFFILTIAVFFIVPLGVLLVLYSVIAKNLME

*Drome*ETHR-A 149 WVAEYKLAEYIDGSSVAVCLTQAISDWTLAFFLMTISVFFVVPFVTLVLYGIIARNLVS

*Drome*ETHR-B 149 AISTYSVEPYGDGTDAPVCTTAADGFWSIFYFVGCITVFFFLPFGILVLLYAAIAYKLLR

*Schgr*ETHR 199 LVAEYGTTEYFDGSMVPVCFMSVDSFWPAFFFLATIAVFFLVPLIILVLYGVIARHLMA

TM6

*Trica*ETHR-A 267 NAATLVLNKH-I-----DNISLRARKQVVLMLGTVVLSFF

*Trica*ETHR-B 267 HPVAMTGTKT-V-----MPSQSAIKYRKQVILMLGTVVLAFF

*Aedae*ETHR-A 208 SNNSRIRKIRLSKPE-----LSYKARKQVVLMLGAVVLAFF

*Aedae*ETHR-B 208 NPGIIMSNASG-----NRNNVIKYRKQVIFMLGAVVVSFF

*Bommo*ETHR-A 274 AASKVVMNK-----TVDPYNARARKQVILMLGTVVLCFF

*Bommo*ETHR-B 275 NPVIIAQSSKNT-----SGTGNVIRYRKQVILMLGTVVLSFF

*Manse*ETHR-A 294 AASKVVMNK-----TVDPYNARARKQVILMLGTVVACFF

*Manse*ETHR-B 294 NPAIIAQNNK-N-----SGSGNVVRYRKQVILMLGTVVLSFF

*Drome*ETHR-A 209 NRAAMLRARPTKPE-----LSLKARKQVVLMLGAVVLSFF

*Drome*ETHR-B 209 PNNAFHRPTSPQPQPSGGATSGSSQVPSTKGNHQQSNMGRKQRQVIFMLVAVVSSFF

*Schgr*ETHR 259 NPRIMSV-----HQQLHYRYRKQVVLMLGTVVAAFF

O TM7

*Trica*ETHR-A 301 ICLIPFRVFLWIIIVPEEQVYHLEIEKYNYLYFCRIMVYLNSAINPILYNLMSSKFR

*Trica*ETHR-B 303 ICLLPFRALTFWIIIVAPAGSNFEIGFENYNYLYFSRIMFHINSVNPILYNIISKFRS

*Aedae*ETHR-A 243 TCLLPFRMLTLWIIIVSEETFOKLAVEKYNNLLYFSRIMLYLNSAVNPILYNLMSSKFRK

*Aedae*ETHR-B 243 FCLLPFRALTLWIIIVPSENIISIGIERFYILLYFCRIMLYMNSAINPILYNLMSSKFRN

*Bommo*ETHR-A 308 ICLMPYRALTLWIIITPS-GFDGISSEKWNILYFSRVMLYINSAINPILYNLMSSKFR

*Bommo*ETHR-B 312 ICLLPFKALTLWIIIVFPETIMSLGIDGYYILLYFCRVMLYLNSAINPILYNLMSSKFRD

*Manse*ETHR-A 328 ICLMPYRALTLWIIITPT-GFDDVSSEKWNILYFSRVMLYINSAINPILYNLMSSKFR

*Manse*ETHR-B 330 ICLLPFKALTLWIIIFPETIMSLGIDGYYILLYFCRVMLYLNSAINPILYNLMSSKFR

*Drome*ETHR-A 244 VCLLPFRVLTTLWIIISTDQTLHDLGLVRYYSLLYFCRIMLYLNSAMNPILYNLMSSKFR

*Drome*ETHR-B 269 VCLLPFRATTLWIIILASAEDVEGLGIAGYNNLLYFSRFMLYLNSAMNPILYNLMSSKFR

*Schgr*ETHR 290 VCLLPFRATTLWIIAAPPETVVSIGYENHYGLLCLCRVMHYLNSAVNPILYNLMSSKFRD

*Trica*ETHR-A 361 GFIIICESN-RKF-----YFKRARNGT-----FSTT-----ANSC-----

*Trica*ETHR-B 363 GFFKLCGMKIVKK-----RRDKREIT-----RKSTSSSTHTSSQQ-----

*Aedae*ETHR-A 303 GFLRLCRCRRLWGHF--LR----RRGGKVRG----RSATFTTT-----

*Aedae*ETHR-B 303 GFLQLGCGKIIRSD--SISSGARKGT-----FHTASTNLSSSHNS--SYQRRFTREGS

*Bommo*ETHR-A 367 GFCKVCICYKK---ENDLNRRRTORTIT-----NGSTTSSSLTR-----

*Bommo*ETHR-B 372 GFVKLLKINKLMRCSRNLRETMQRD-----FNNTTSTGFSSSQN-----

*Manse*ETHR-A 387 GFCKVCICYKK---EEELNRRRORTIT-----NGSTTSSSLTR-----

*Manse*ETHR-B 390 GFVKLLKINKLMRYSRNLRETMQRD-----FNNTTSTGFSSSQN-----

*Drome*ETHR-A 304 GFKRLCQDAGRLLE--LVTLGRKEDSSRG----RRGTLSLGMGTNTNTNTNNSNATGA

*Drome*ETHR-B 329 GFWRLLLT-----CLGQRPHHHHRHHYHQHQHPTAGGSGRNASTRQEQDAEEGA

*Schgr*ETHR 350 GFSRLCRCRCGAGGP--LGRRGTGLSSSATA-----TTVRSSAGDSLW-----RRPGR

*Trica*ETHR-A 390 ----RSTFRNNR-----DEYNVCFRPNNSILIKNFNDS-----PE

*Trica*ETHR-B 399 ----TSDSFLSKR-----NSEKKCGSLRE----IKEVSDCD-----SSE

*Aedae*ETHR-A 336 ----TSSYLASSSIRKSS-----EKYTLSLDDLRFQQLPVCSNGL-P

*Aedae*ETHR-B 353 CISGSIRAVSDN-SRRR----LLHQHRS-----STISI

*Bommo*ETHR-A 402 ----TINSLKKFQGHRTSVDRSEATNSKDEERSLFDRIFPNRAFLRQOSAPVCS--NLN

*Bommo*ETHR-B 413 ----TSDSFWRRYSNRVSSQKNIENNSKKIKEE--KV-----NPIKIGEIVNVE

*Manse*ETHR-A 422 ----TINSLKKLFSHRGVSERKIEESCNRREEEKGLFERIFPNRSFIROOSAPVCS--SNN

*Manse*ETHR-B 431 ----TSDSFWRRYSNRITSSQKIILNKERLQDTE--RK-----QSLKIGEIVNVE

*Drome*ETHR-A 358 ----TSSSILSRSSNRCS-----EDIS--RTRLKIEMQMPCGSDLEA

*Drome*ETHR-B 378 ALAGTTSARHPRRTLRREATFLINSISTSSG----TDRTSSSAWRSNLSL-----ISG

*Schgr*ETHR 396 A---SSSSRSRRAERR---LLHHIA-----RECSVSVHN

TricaETHR-A 423 --SNRSNE-----  
TricaETHR-B 430 --SRKEVY-----  
AedaeETHR-A 374 -MASTESGTRGKDASSIVVVVSDDD--EFPQLSRFYRMNLLRQYSTPLLPCYEDRGRPP  
AedaeETHR-B 381 RSSHDEHSGTGGGGSGVPIQTGNGTIETTPLKADKIEELD-----ETT  
BommoETHR-A 456 --PNRINRMRSEGC-----MDINRPDNI-----HS--NLNPKVIRSEID  
BommoETHR-B 456 --NTRRNSMKFIAA-----LNED-AQIDNEVEIAD--NENNKQIQ----  
ManseETHR-A 476 --PNKINRMRSEGC-----MEIDKIEDVGRVHSNS--NFNNKNIRSSVD  
ManseETHR-B 474 --NTRRNSMKVIAA-----LNES-IEAVDEA-SEY--TEHNKQIH----  
DromeETHR-A 395 -MAMLQHSTLKGKIA---RRVSDSR--LMPL-----RNHQPRRHKPKQ  
DromeETHR-B 428 -LSEREGILGAAIIGTTA-----ATVTTACLQERRASK  
SchgrETHR 425 GVCAVKA-GRSKDVSYL\*-----

TricaETHR-A 429 IDGPEK\*-----  
TricaETHR-B 436 VRVPLGQRFSGEIVFV\*-----  
AedaeETHR-A 431 LPSTEPGINS-----NKSVESAV--KRQAFNVTFKESSE  
AedaeETHR-B 424 NSLPNGYGFNR-----FKHVASAA--GGNSCNVSEFKTTN  
BommoETHR-A 491 ADLPRANSLRRNVLINTAKAKSVDSERNVMNYSKKTKVDSVVAFAQK----SKSVDYEFPE  
BommoETHR-B 491 -----ILNLDVKTNSVYSITLDVSKEGKNRFCVPAQDRDNKNIFIYDYNTKE  
ManseETHR-A 516 IDMPRANSLRRSVLINSAKAKSVSDKFKVSYQ-KIKVDCVVAFAQK----SKSVDYEFPE  
ManseETHR-B 508 -----ILNLDKKTNSVYSITLDVNNEGGNRFMCIPQDAEYKNNIYICNYNAKE  
DromeETHR-A 431 IS-FDEESLEE-----NKRSEAKI--PTK-----CRE  
DromeETHR-B 461 I\*-----  
SchgrETHR -----

TricaETHR-A -----  
TricaETHR-B -----  
AedaeETHR-A 463 RRKNNNNDSSAGSNGVILVEPGSAWGNLFPW-----KLKFIRQOTT  
AedaeETHR-B 456 SCN--GKTSHRMNGTVSVEPKAVHQA-DNKYLIVRAAVVVMREVSEENGKPLPLSSSTKS  
BommoETHR-A 547 SFV\*-----  
BommoETHR-B 539 SFV\*-----  
ManseETHR-A 571 SFV\*-----  
ManseETHR-B 556 SFV\*-----  
DromeETHR-A 455 -----KLPGIAREIVNLT---ENTL\*  
DromeETHR-B -----  
SchgrETHR -----

TricaETHR-A -----  
TricaETHR-B -----  
AedaeETHR-A 504 PPQLQEQRPNSHVASAKAAVIIGVERRLPMSPRTKKQM-SLDESLLGARGNHCTVEGD\*--  
AedaeETHR-B 513 PPAENGST-----EAEGT-LI-----QSARGSEQIVSIITAKERANG-NCVNRTQRA  
BommoETHR-A -----  
BommoETHR-B -----  
ManseETHR-A -----  
ManseETHR-B -----  
DromeETHR-A -----  
DromeETHR-B -----  
SchgrETHR -----

TricaETHR-A -----  
TricaETHR-B -----  
AedaeETHR-A 561 -----SGAGEV\*-----  
AedaeETHR-B 558 DTKNTNEDAVAFDEINKIRQFYGSMECDI\*  
BommoETHR-A -----  
BommoETHR-B -----  
ManseETHR-A -----  
ManseETHR-B -----  
DromeETHR-A -----  
DromeETHR-B -----  
SchgrETHR -----

**Supplementary figure S1. Multiple sequence alignment of the cloned *Schgr*ETHR with other functionally characterized holometabolous insect ETH receptors (Clustal Omega, <http://www.ebi.ac.uk/Tools/msa/clustalo>).** The seven transmembrane regions (as predicted for *Schgr*ETHR) are indicated above the sequences in grey shading. A disulphide bridge highly conserved in rhodopsin-like GPCRs, indicated with “+” is formed between a cysteine (C) at the beginning of transmembrane 3 and in extracellular loop 2. The histidine (H) typically conserved in transmembrane region 3 of all ETH receptors is indicated with “◊”. The typical rhodopsin-like conserved ERY motif immediately following the third transmembrane helix is indicated with asterisks (\*\*\*) . The leucine (L) replacing tryptophan (W), which is a typical feature of ETH receptors, in the highly conserved FXXCWXPFHXXR motif in transmembrane 6 of rhodopsin-related GPCRs is indicated with “O”.

>*Schgr*ETH

MLLFKETFASLAVLVVLVAAAAAEPDEGANLFLKASRSVPHV**GRR****S**DFFLKTAKSVPRI**GRR****S**DLFLKSAKSVPRI**GRR**TNLAAI  
EAQDGSEWLWPGGADAMPAPV**RR**QAYYVRKDGQPVMWSDVARDVEENPDLWPWNDFDAGNTREVDNSR\*

**Supplementary figure S2. Translation of the cloned *Schgr*ETH precursor sequence.** The signal peptide as predicted by SignalP 4.1, is indicated in italics and underlined. *Schgr*ETH1 and *Schgr*ETH2 are boxed. Cleavage sites are indicated in bold. \* represents a stop codon.

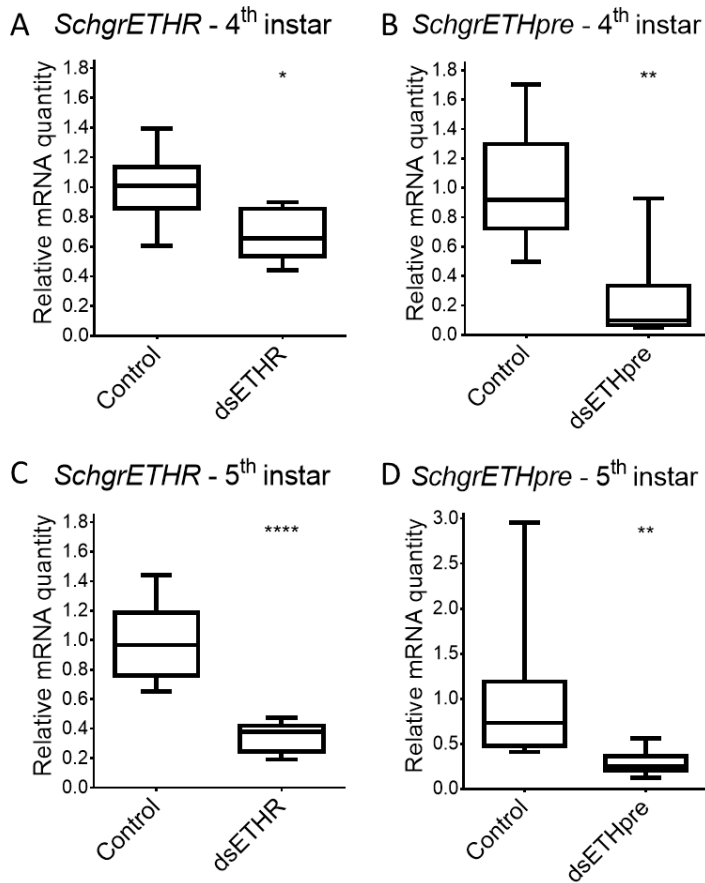

**Supplementary figure S3. Efficiency of RNAi-mediated knockdown of *SchgrETHR* and *SchgrETHpre* in (A-B) 4-day-old fourth instar and (C-D) 6-day-old fifth instar male *S. gregaria*.** Relative *SchgrETHR* and *SchgrETHpre* transcript levels were measured in the heads dissected from control locusts and locusts injected with *SchgrETHR* or *SchgrETHpre* dsRNA, using qRT-PCR. Locusts were injected on day 1 and 4 of the fourth instar stage, as well as on day 1, 3 and 5 of the fifth instar stage with 400 ng of dsRNA against *GFP* (control), *SchgrETHR* or *SchgrETHpre*. The data represent box plots (min to max) of six or seven individual locusts, run in duplicate and normalized to *RP49* and *EF1 $\alpha$*  transcript levels for fourth instars and  *$\beta$ -actin* and *EF1 $\alpha$*  transcript levels for fifth instars. Significant differences ( $p < 0.5$ ,  $p < 0.01$  and  $p < 0.0001$ ) are indicated by (an) asterisk(s) (\*, \*\* and \*\*\*\* respectively) (one-sided Welch's *t*-test on log-transformed data).
